# Supplementary material for: Bioinformatics and Connectivity Map Analysis Suggest Viral Infection as a Critical Causative Factor of Hashimoto’s Thyroiditis
Source: MDPI journal article supplement (doi:10.3390/ijms24021157), 2023-01-06
Supplement: s1 [file s1]

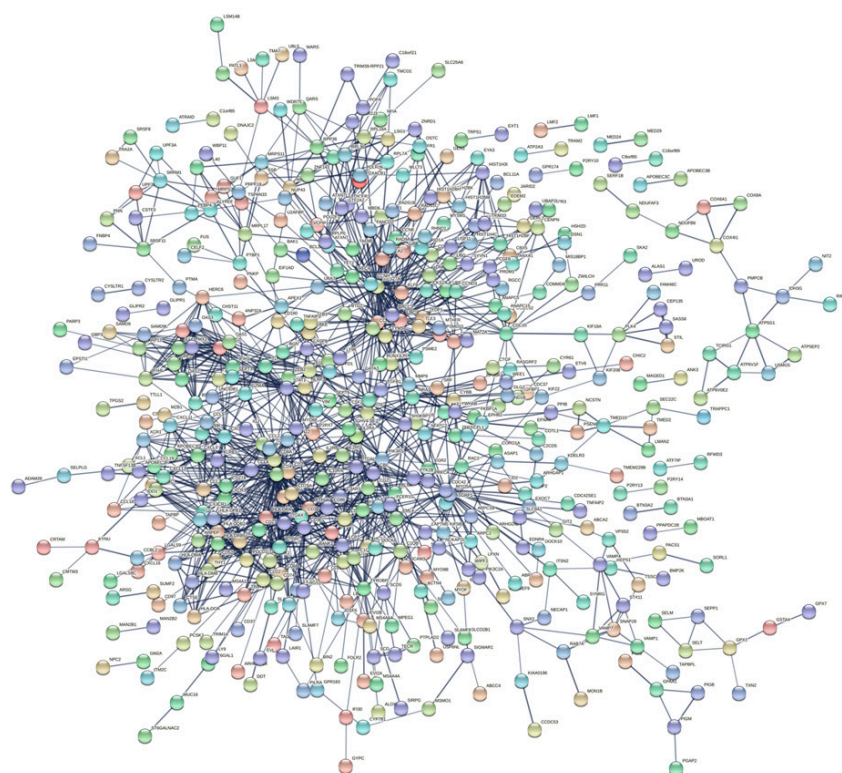

**Figure S1 PPI network of upregulated DEGs in the HT group obtained from thyroid tissue microarray data.**

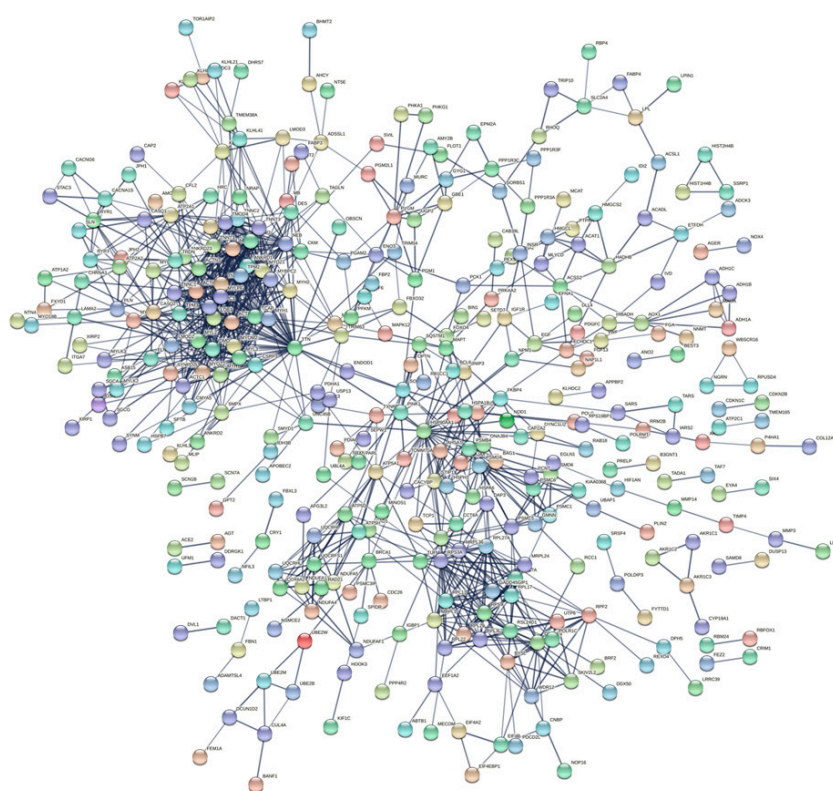

**Figure S2 Total PPI network of downregulated DEGs in the HT group obtained from thyroid tissue microarray data.**

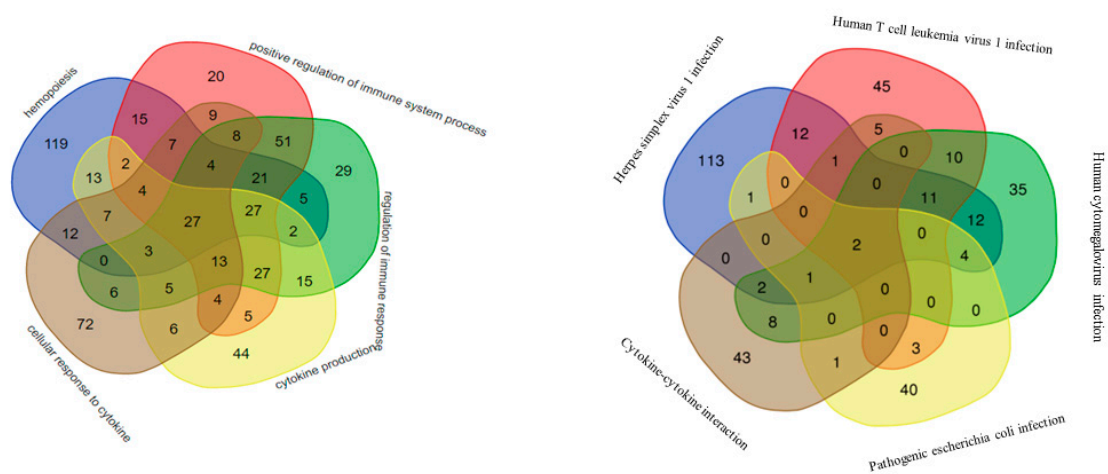

**Figure S3 Venn diagram showing gene distribution for the top five significant (A) BP terms and (B) KEGG pathways of the HT group. Total gene lists are provided as a supplementary data file.**
